# Supplementary material for: Long-Term Regulation of Excitation–Contraction Coupling and Oxidative Stress in Cardiac Myocytes by Pirfenidone
Source: PubMed Central journal article supplement (PMC6300477; doi:10.3389/fphys.2018.01801), 2018-12-13
Supplement: Data_Sheet_1.pdf [file Data_Sheet_1.pdf]

## Supplementary Material

### Long-term regulation of excitation-contraction coupling and oxidative stress in cardiac myocytes by pirfenidone

Adrián Monsalvo-Villegas, Diana Stephanie Osornio-Garduño, and Guillermo Avila\*

\* **Correspondence:** Corresponding Author: gavila@cinvestav.mx

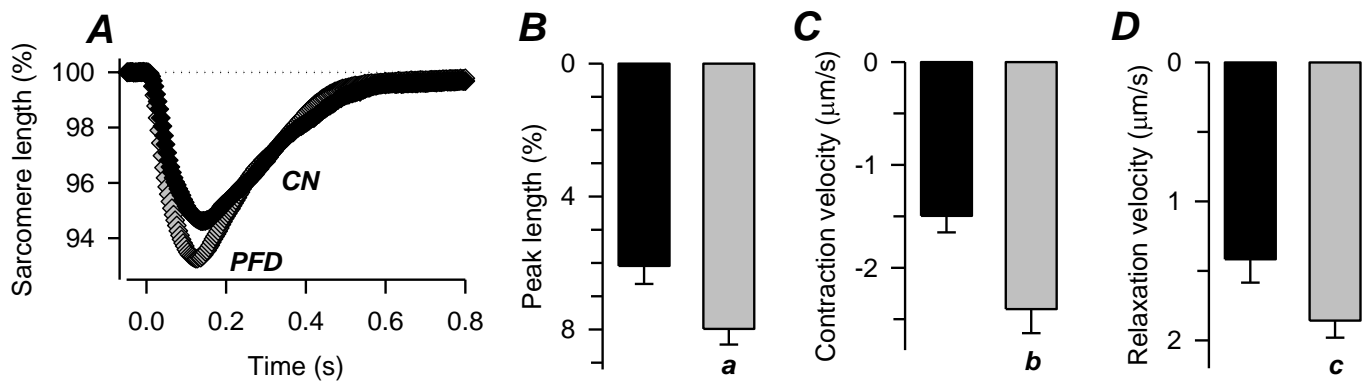

**Supplementary Figure 1.** PFD stimulates contractile properties of the sarcomere. **A)** Ventricular myocytes were cultured 1-2 d in the absence (CN, *closed symbols*) or presence of PFD (*gray symbols*) and then electrically stimulated to assess the length of the sarcomere as a function of time. Shown are mean values obtained from 129 cells (61 CN, 68 PFD). For each cell, the maximal values of shortening (**B**), and velocities of contraction (**C**) and relaxation (**D**) was estimated as well. <sup>a</sup>p<0.01, <sup>b</sup>p<0.005, <sup>c</sup>p<0.05.

## Supplementary Material

### Long-term regulation of excitation-contraction coupling and oxidative stress in cardiac myocytes by pirfenidone

Adrián Monsalvo-Villegas, Diana Stephanie Osornio-Garduño, and Guillermo Avila\*

\* **Correspondence:** Corresponding Author: gavila@cinvestav.mx

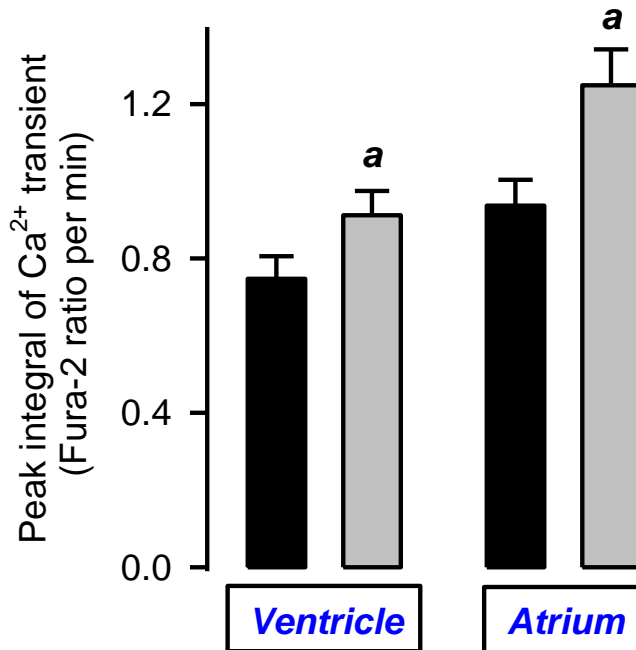

**Supplementary Figure 2.** Average values of the integral of the initial phase of the Ca<sup>2+</sup> transient estimated as the area from the stimulus to the peak amplitude. Same cells as in Fig. 4. <sup>a</sup>p<0.05, compared with the corresponding control (closed bars).

## Supplementary Material

### Long-term regulation of excitation-contraction coupling and oxidative stress in cardiac myocytes by pirfenidone

Adrián Monsalvo-Villegas, Diana Stephanie Osornio-Garduño, and Guillermo Avila\*

\* **Correspondence:** Corresponding Author: gavila@cinvestav.mx

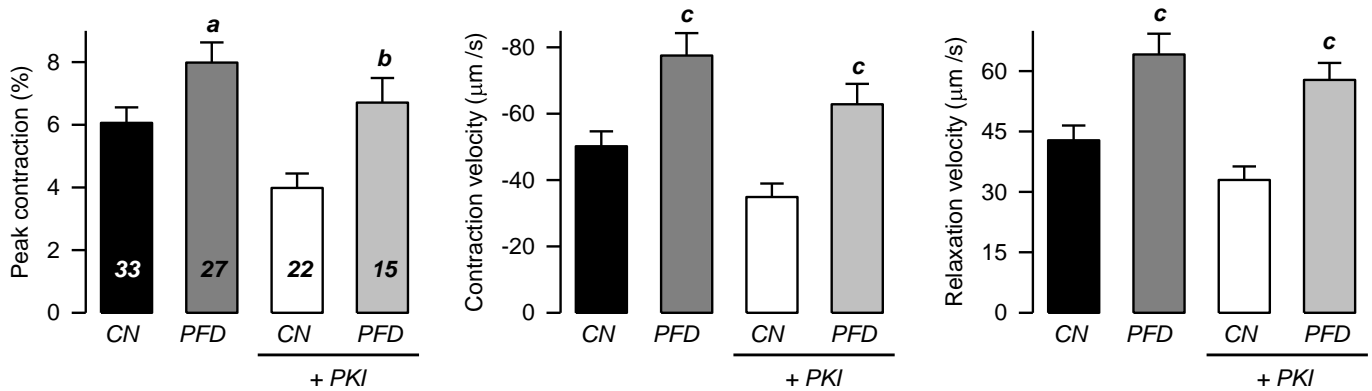

**Supplementary Figure 3.** PKA is not involved in up-regulation of contractility by PFD. Some control (CN) and PFD-treated ventricular myocytes were exposed 30 min to a cell-permeable PKA inhibitor (myristoylated PKI 14-22 amide, 5  $\mu\text{M}$ ). Subsequently, cell contractility was assessed as in Fig. 3. <sup>a</sup> $p < 0.05$ , <sup>b</sup> $p < 0.005$ , <sup>c</sup> $p < 0.001$ ; compared with its corresponding control.

## Supplementary Material

### Long-term regulation of excitation-contraction coupling and oxidative stress in cardiac myocytes by pirfenidone

Adrián Monsalvo-Villegas, Diana Stephanie Osornio-Garduño, and Guillermo Avila\*

\* **Correspondence:** Corresponding Author: gavila@cinvestav.mx

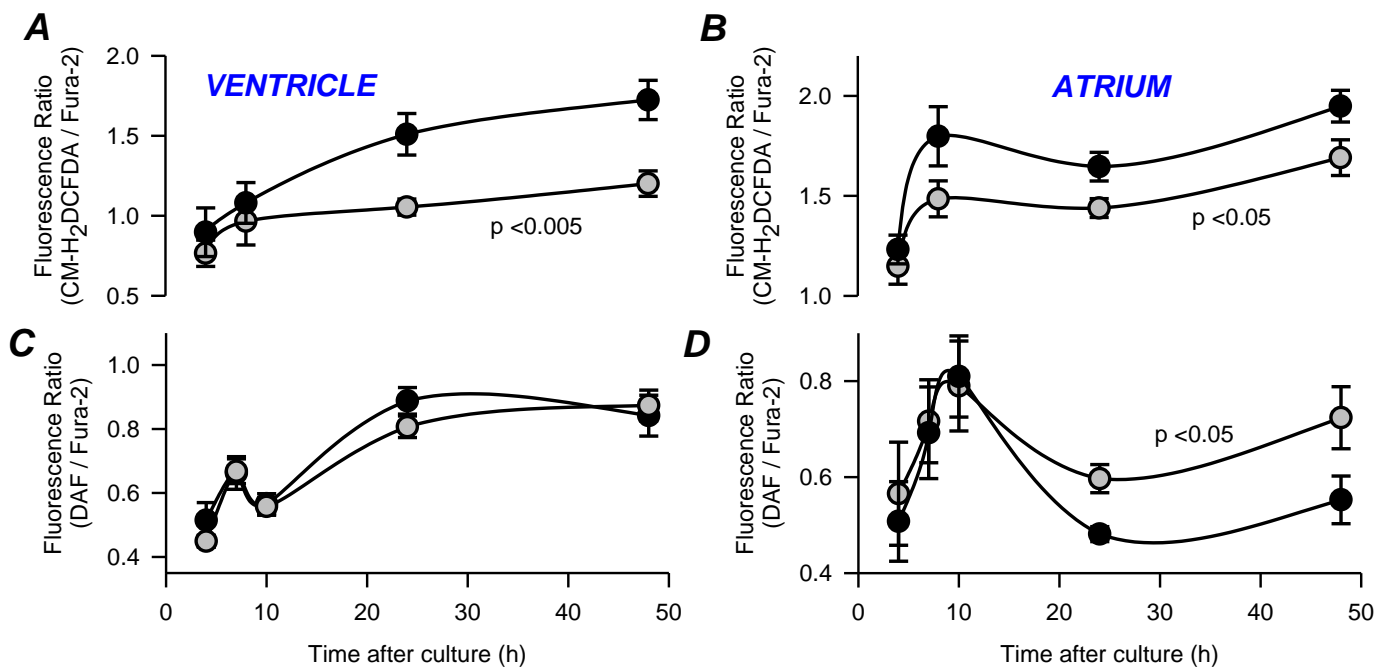

**Supplementary Figure 4.** Time-course of free radicals production. The panels show fluorescence levels representing the production of ROS (A, B) and NO (C, D) as a function of time in culture, under either control (*closed symbols*) or PFD (*gray symbols*) conditions. The p values represent significant differences between control and PFD (ANOVA). Each data point was obtained from a total of eight (D, 8 h; CN and PFD) to 55 (A, 24 h; PFD) myocytes.

## Supplementary Material

### Long-term regulation of excitation-contraction coupling and oxidative stress in cardiac myocytes by pirfenidone

Adrián Monsalvo-Villegas, Diana Stephanie Osornio-Garduño, and Guillermo Avila\*

\* **Correspondence:** Corresponding Author: gavila@cinvestav.mx

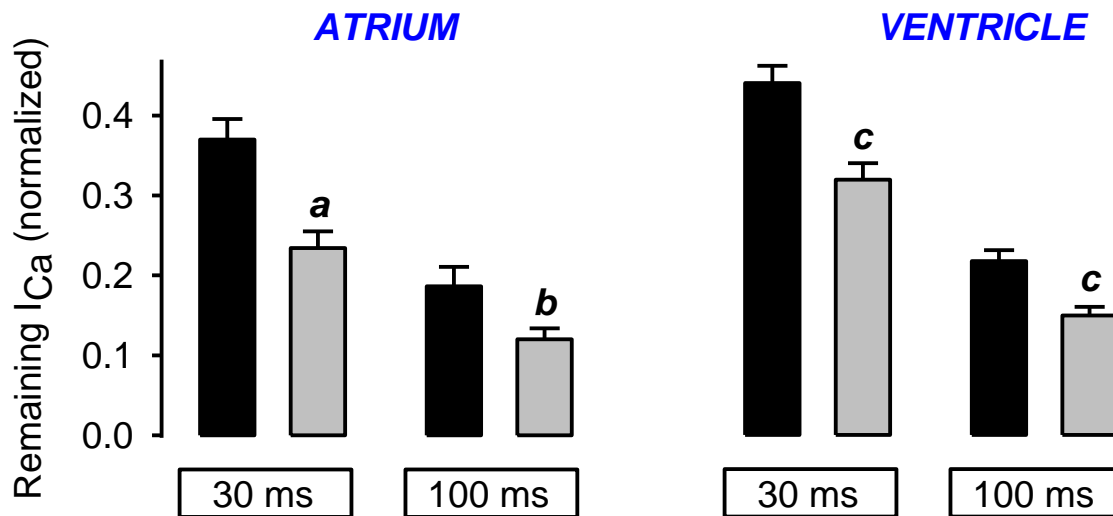

**Supplementary Figure 5.** PFD promotes accelerated kinetics of I<sub>Ca</sub> inactivation. Fraction of I<sub>Ca</sub> that remains not inactivated after 30 and 100 ms of depolarization. Results are from same cells as in Figs. 1D (atrium, at +10 mV) and 1E (ventricle, at +20 mV). a, b and c represent significant differences ( $p < 0.005$ ,  $p < 0.05$  and  $p < 0.001$ ), compared with the respective control (closed bars).
